# Supplementary material
Source: PubMed Central journal article supplement (PMC2785990)
Supplement: pp.109.136804_1.pdf [file pp.109.136804_1.pdf]

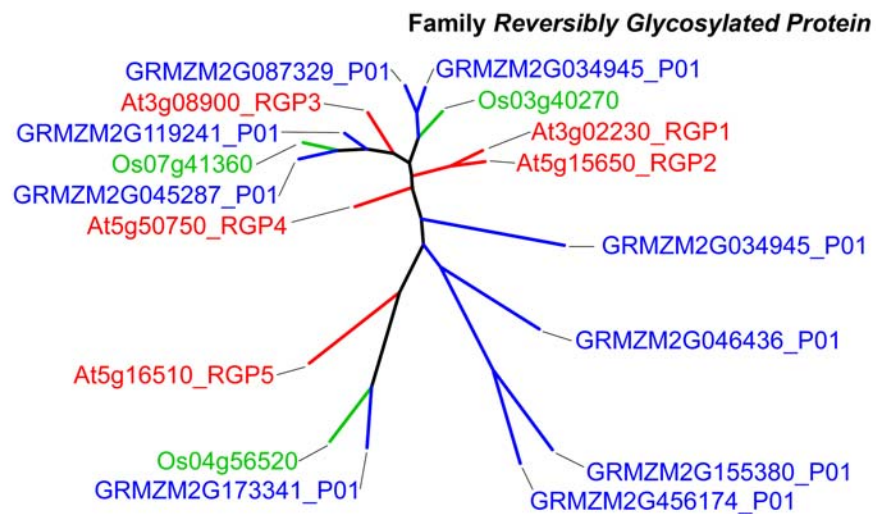

**Figure S1.** The RGP gene family. Maize (blue), rice (green), and Arabidopsis (red) show the large expansion of RGP-like sequences in maize.
