# Supplementary material
Source: PubMed Central journal article supplement (PMC2785990)
Supplement: pp.109.136804_4.pdf [file pp.109.136804_4.pdf]

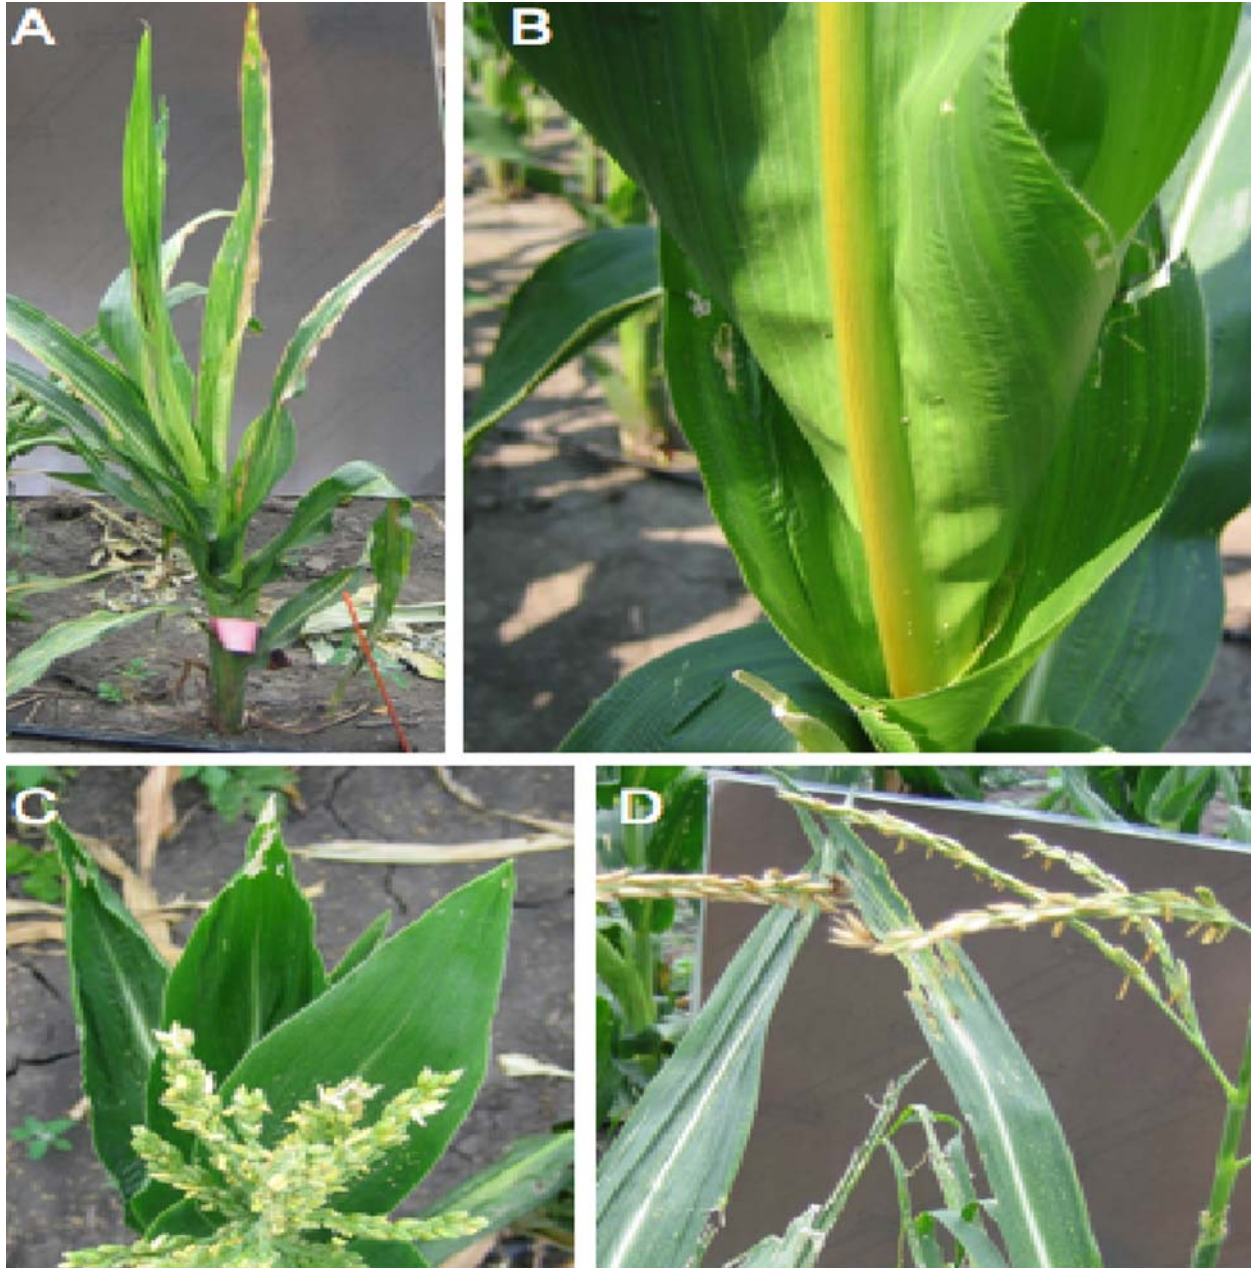

Figure S4. Examples of visible mutants selected from the Uniform*Mu* population. **A.** *crinkly dwarf*, **B.** *brown midrib*, **C.** *elf-eared leaves*, **D.** *shredded leaf*
